# Supplementary material
Source: publisher site journal article supplement (https://www.spandidos-publications.com/8637/downloadSupplementary)

Figure S1. Knockdown efficiency of AdipoR1-targeting siRNA in cardiomyocytes assessed using RT-qPCR, reverse transcription-quantitative PCR. The data are presented as mean±SEM. \*\*\*P<0.001. AdipoR1, adiponectin receptor 1; siRNA/si, small interfering RNA; NC, negative control.

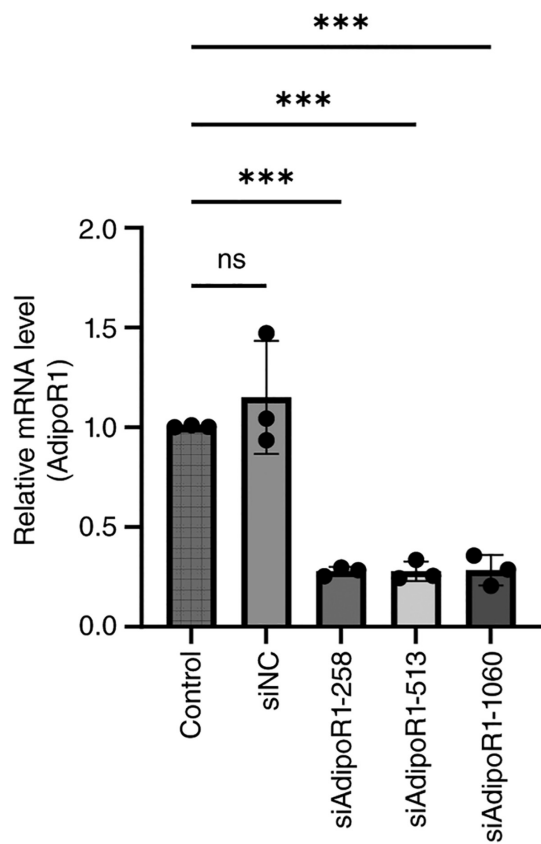

Figure S2. Western blot analysis shows the knockdown efficiency of AdipoR1-targeting siRNA in cardiomyocytes. The data are presented as mean±SEM. \*\*\*P<0.001, \*\*\*\*P<0.0001. AdipoR1, adiponectin receptor 1; siRNA/si, small interfering RNA; NC, negative control.

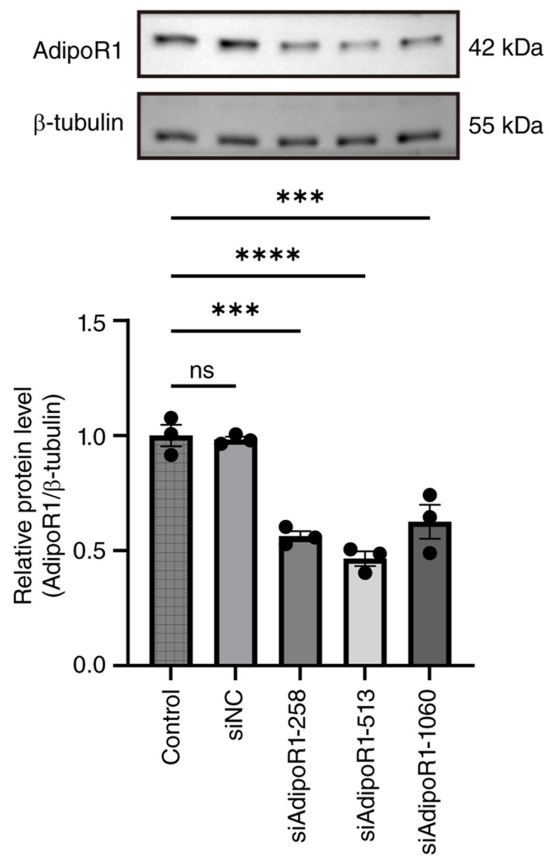

Supplement: Supplementary file 1 [file downloadSupplementary]
